# Supplementary material for: Those That Remain: Sorption/Desorption Behaviour and Kinetics of the Neonicotinoids Still in Use
Source: MDPI journal article supplement (doi:10.3390/ijms24076548), 2023-03-31
Supplement: s1 [file s1]

**Table S2.** Sorption and desorption parameters with statistical indices estimated by Elowich (EM) nonlinear kinetics model describing the sorption/desorption processes of acetamiprid and thiachloprid in experimental soils.

| Sorption                              |         |         |          |         | Desorption                            |         |         |         |          |
|---------------------------------------|---------|---------|----------|---------|---------------------------------------|---------|---------|---------|----------|
| Fitted/statistical parameter          | S1      | S2      | S3       | S4      | Fitted/statistical parameter          | S1      | S2      | S3      | S4       |
| Acetamiprid                           |         |         |          |         |                                       |         |         |         |          |
| $(1/Y)\text{Ln}(XY)^{\text{sor (a)}}$ | 65.95   | 49.81   | 58.33    | 60.70   | $(1/Y)\text{Ln}(XY)^{\text{des (c)}}$ | 74.11   | 50.23   | 65.82   | 67.14    |
| (mg/kg)                               | (±2.21) | (±0.64) | (±1.21)  | (±3.28) | (mg/kg)                               | (±2.98) | (±2.41) | (±3.36) | (± 2.56) |
| $1/Y^{\text{sor (b)}}$                | 2.43    | 1.46    | 2.58     | 2.23    | $1/Y^{\text{des (d)}}$                | 0.94    | 1.93    | 1.43    | 1.36     |
|                                       | (±0.18) | (±0.23) | (±0.64)  | (±0.45) |                                       | (±0.25) | (±0.52) | (±0.39) | (±0.18)  |
| % (e)                                 | 85      | 90      | 85       | 87      | % (e)                                 | 62      | 50      | 29      | 28       |
| $R^2$ (f)                             | 0.9880  | 0.9789  | 0.9534   | 0.9360  | $R^2$ (f)                             | 0.9050  | 0.9503  | 0.9449  | 0.9537   |
| SRMSE (g)                             | 0.0437  | 0.0774  | 0.0967   | 0.1322  | SRMSE (g)                             | 0.1268  | 0.0803  | 0.0888  | 0.0841   |
| err-% (h)                             | 3.51    | 5.92    | 7.75     | 10.61   | err-% (h)                             | 10.18   | 6.45    | 7.13    | 6.76     |
| Thiacloprid                           |         |         |          |         |                                       |         |         |         |          |
| $(1/Y)\text{Ln}(XY)^{\text{sor (a)}}$ | 94.25   | 62.16   | 75.44    | 85.08   | $(1/Y)\text{Ln}(XY)^{\text{des(c)}}$  | 97.66   | 73.39   | 85.14   | 93.11    |
| (mg/kg)                               | (±4.14) | (±3.18) | (± 4.98) | (±3.95) | (mg/kg)                               | (±4.11) | (±2.32) | (±3.21) | (±5.16)  |
| $1/Y^{\text{sor (b)}}$                | 5.46    | 4.17    | 4.05     | 4.46    | $1/Y^{\text{des(d)}}$                 | 0.36    | 1.26    | 1.07    | 0.46     |
|                                       | (±0.07) | (±0.38) | (±0.51)  | (±0.35) |                                       | (±0.11) | (±0.23) | (±0.19) | (±0.13)  |
| % (e)                                 | 97      | 93      | 91       | 93      | % (e)                                 | 47      | 32      | 44      | 37       |
| $R^2$ (f)                             | 0.7225  | 0.6670  | 0.7156   | 0.8365  | $R^2$ (f)                             | 0.9030  | 0.9924  | 0.9911  | 0.9748   |
| SRMSE (g)                             | 0.2572  | 0.2963  | 0.2668   | 0.2419  | SRMSE (g)                             | 0.1333  | 0.0126  | 0.0169  | 0.0452   |
| err-% (h)                             | 20.65   | 23.79   | 21.42    | 19.42   | err-% (h)                             | 10.71   | 1.01    | 1.36    | 3.63     |

(a), (b), (c), (d) – sorbed/desorbed parameters obtained by modelling with Elowich (EM); (e) – amount sorbed/desorbed during the rapid phase (1 h) in regards to the sorbed/desorbed amount at 96 h; (f) – coefficient of multiple determination (g) – Scaled Root Mean Squared Error; (h) – minimum error level of  $\chi^2$  test
