# Supplementary material for: Those That Remain: Sorption/Desorption Behaviour and Kinetics of the Neonicotinoids Still in Use
Source: MDPI journal article supplement (doi:10.3390/ijms24076548), 2023-03-31
Supplement: s1 [file s1]

**Table S4.** Correlation coefficients between physico-chemical soil characteristics and acetamiprid/thiacloprid sorption parameters obtained by Pseudo First-Order (PFOM), Elowich (EM) and Weber-Morris (WMM) represented by correlation matrix (N = 1200; pooled data; 4 soils x 3 replication x 10 soil characteristics x 10 sorption parameters). Statistically significant correlations ( $p < 0.05$ ) are presented with bold type numbers and with corresponding p values (written in parentheses in italics).

| Variable                                   | pH     | HA <sup>(a)</sup> | CEC <sup>(b)</sup> | clay   | TOC <sup>(c)</sup>                  | C <sub>oxHa</sub> <sup>(d)</sup> | C <sub>oxFa</sub> <sup>(e)</sup>    | ratio 465/665                      | ratio C/H                           | ratio C/N |
|--------------------------------------------|--------|-------------------|--------------------|--------|-------------------------------------|----------------------------------|-------------------------------------|------------------------------------|-------------------------------------|-----------|
| <b>Acetamiprid</b>                         |        |                   |                    |        |                                     |                                  |                                     |                                    |                                     |           |
| <b>q<sub>sor</sub></b> <sup>(f)</sup>      | -0.472 | 0.809             | 0.816              | -0.511 | <b>0.950</b><br>( <i>p=0.049</i> )  | 0.419                            | 0.691                               | <b>0.994</b><br>( <i>p=0.006</i> ) | 0.856                               | 0.780     |
| <b>k<sub>1</sub> (PFOM)</b> <sup>(g)</sup> | -0.270 | 0.643             | 0.644              | -0.280 | 0.907                               | 0.503                            | 0.556                               | <b>0.954</b><br>( <i>p=0.046</i> ) | 0.840                               | 0.601     |
| <b>(1/Y)Ln(XY) (EM)</b> <sup>(h)</sup>     | -0.397 | 0.803             | 0.789              | -0.467 | <b>0.973</b><br>( <i>p=0.027</i> )  | 0.351                            | 0.727                               | <b>0.998</b><br>( <i>p=0.002</i> ) | 0.903                               | 0.768     |
| <b>(1/Y) (EM)</b> <sup>(i)</sup>           | -0.244 | 0.375             | 0.444              | -0.104 | 0.666                               | 0.799                            | 0.191                               | 0.780                              | 0.556                               | 0.344     |
| <b>C (WMM)</b> <sup>(j)</sup>              | -0.364 | 0.790             | 0.770              | -0.439 | <b>0.975</b><br>( <i>p=0.025</i> )  | 0.341                            | 0.725                               | <b>0.996</b><br>( <i>p=0.004</i> ) | 0.913                               | 0.752     |
| <b>k (WMM)</b> <sup>(k)</sup>              | -0.528 | 0.866             | 0.868              | -0.589 | <b>0.959</b> ( <i>p=0.041</i> )     | 0.354                            | 0.748                               | <b>0.994</b><br>( <i>p=0.006</i> ) | 0.863                               | 0.840     |
| <b>Thiacloprid</b>                         |        |                   |                    |        |                                     |                                  |                                     |                                    |                                     |           |
| <b>q<sub>sor</sub></b> <sup>(f)</sup>      | -0.275 | 0.752             | 0.716              | -0.367 | <b>0.977</b><br>( <i>p=0.023</i> )  | 0.302                            | 0.723                               | <b>0.984</b><br>( <i>p=0.016</i> ) | 0.937                               | 0.708     |
| <b>k<sub>1</sub> (PFOM)</b> <sup>(g)</sup> | -0.394 | 0.919             | 0.845              | -0.600 | <b>0.978</b><br>( <i>p=0.022</i> )  | -0.048                           | 0.944                               | 0.931                              | <b>0.956</b><br>( <i>p=0.044</i> )  | 0.886     |
| <b>(1/Y)Ln(XY) (EM)</b> <sup>(h)</sup>     | -0.348 | 0.835             | 0.791              | -0.475 | <b>0.997</b> ( <i>p=0.003</i> )     | 0.204                            | 0.812                               | <b>0.991</b><br>( <i>p=0.009</i> ) | <b>0.955</b><br>( <i>p=0.045</i> )  | 0.796     |
| <b>(1/Y) (EM)</b> <sup>(i)</sup>           | 0.060  | -0.745            | -0.613             | 0.330  | -0.919                              | 0.237                            | -0.906                              | -0.820                             | <b>-0.982</b><br>( <i>p=0.018</i> ) | -0.694    |
| <b>C (WMM)</b> <sup>(j)</sup>              | -0.360 | 0.839             | 0.797              | -0.483 | <b>0.996</b><br>( <i>p=0.004</i> )  | 0.211                            | 0.811                               | <b>0.992</b><br>( <i>p=0.008</i> ) | <b>0.951</b><br>( <i>p=0.049</i> )  | 0.800     |
| <b>k (WMM)</b> <sup>(k)</sup>              | 0.452  | -0.948            | -0.876             | 0.667  | <b>-0.954</b><br>( <i>p=0.046</i> ) | 0.097                            | <b>-0.965</b><br>( <i>p=0.035</i> ) | 0.904                              | -0.926                              | -0.922    |

<sup>(a)</sup> – hydrolitic acidity; <sup>(b)</sup> – cation exchange capacity; <sup>(c)</sup> – total organic carbon; <sup>(d)</sup> – carbon of humic acids; <sup>(e)</sup> – carbon of fulvic acids; <sup>(f)</sup> – sorbed amount in 96. h; <sup>(g)</sup>, <sup>(h)</sup>, <sup>(i)</sup>, <sup>(j)</sup>, <sup>(k)</sup>. – parameters obtained by modelling with Pseudo-First Order (PFOM), Elowich (EM) and Weber-Morris (WMM) models.
