# Supplementary material for: Those That Remain: Sorption/Desorption Behaviour and Kinetics of the Neonicotinoids Still in Use
Source: MDPI journal article supplement (doi:10.3390/ijms24076548), 2023-03-31
Supplement: s1 [file s1]

**Table S3.** Sorption and desorption parameters with statistical indices estimated by Weber-Morris (WMM) nonlinear kinetics model describing the sorption/desorption processes of acetamiprid and thiachloprid in experimental soils.

| Sorption                     |           |           |           |           | Desorption                   |           |           |           |           |
|------------------------------|-----------|-----------|-----------|-----------|------------------------------|-----------|-----------|-----------|-----------|
| Fitted/statistical parameter | S1        | S2        | S3        | S4        | Fitted/statistical parameter | S1        | S2        | S3        | S4        |
| Acetamiprid                  |           |           |           |           |                              |           |           |           |           |
| $I_{\text{sor}}^{(a)}$       | 64.65     | 49.19     | 57.44     | 60.12     | $I_{\text{des}}^{(c)}$       | 74.32     | 50.76     | 66.74     | 67.99     |
| (mg/kg)                      | (±5.72)   | (±3.52)   | (±6.12)   | (±5.56)   | (mg/kg)                      | (±0.33)   | (±0.46)   | (±0.28)   | (±0.89)   |
| $k_{\text{sor}}^{(b)}$       | 1.5228    | 0.8680    | 1.1771    | 1.2236    | $k_{\text{des}}^{(d)}$       | 0.5048    | 1.0661    | 0.9409    | 0.8867    |
| (mg/kg/h <sup>1/2</sup> )    | (±0.0834) | (±0.0346) | (±0.3218) | (±0.1235) | (mg/kg/h <sup>1/2</sup> )    | (±0.0438) | (±0.1348) | (±0.0945) | (±0.0825) |
| $R^2^{(e)}$                  | 0.9172    | 0.7143    | 0.7370    | 0.8626    | $R^2^{(e)}$                  | 0.6170    | 0.6819    | 0.9682    | 0.9576    |
| SRMSE <sup>(f)</sup>         | 0.1864    | 0.2956    | 0.2903    | 0.2055    | SRMSE <sup>(f)</sup>         | 0.3896    | 0.2986    | 0.0654    | 0.0765    |
| err-% <sup>(g)</sup>         | 14.97     | 23.73     | 23.31     | 16.51     | err-% <sup>(g)</sup>         | 32.68     | 24.03     | 5.96      | 7.88      |
| Thiacloprid                  |           |           |           |           |                              |           |           |           |           |
| $I_{\text{sor}}^{(a)}$       | 94.13     | 62.05     | 75.38     | 84.60     | $I_{\text{des}}^{(c)}$       | 97.74     | 74.02     | 85.55     | 93.26     |
| (mg/kg)                      | (±5.68)   | (±7.83)   | (±10.11)  | (±9.21)   | (mg/kg)                      | (±0.87)   | (±1.26)   | (±1.48)   | (±0.85)   |
| $k_{\text{sor}}^{(b)}$       | 0.6949    | 2.0069    | 1.9362    | 1.2941    | $k_{\text{des}}^{(d)}$       | 0.1931    | 0.7762    | 0.6209    | 0.2605    |
| (mg/kg/h <sup>1/2</sup> )    | (±0.0935) | (±0.2534) | (±0.4587) | (±0.1124) | (mg/kg/h <sup>1/2</sup> )    | (±0.0745) | (±0.1225) | (±0.0978) | (±0.0371) |
| $R^2^{(e)}$                  | 0.7325    | 0.4635    | 0.5851    | 0.5524    | $R^2^{(e)}$                  | 0.5974    | 0.8860    | 0.7987    | 0.7477    |
| SRMSE <sup>(f)</sup>         | 0.3061    | 0.4025    | 0.3204    | 0.3312    | SRMSE <sup>(f)</sup>         | 0.3578    | 0.1682    | 0.2356    | 0.2576    |
| err-% <sup>(g)</sup>         | 24.58     | 35.31     | 29.36     | 30.11     | err-% <sup>(g)</sup>         | 30.12     | 14.78     | 18.56     | 20.46     |

(a). (b). (c). (d) – sorbed/desorbed parameters obtained by modelling with with Weber-Morris model (WMM);<sup>(e)</sup> – coefficient of multiple determination <sup>(f)</sup> – Scaled Root Mean Squared Error; <sup>(g)</sup> – minimum error level of  $\chi^2$  test
