# Supplementary material for: Those That Remain: Sorption/Desorption Behaviour and Kinetics of the Neonicotinoids Still in Use
Source: MDPI journal article supplement (doi:10.3390/ijms24076548), 2023-03-31
Supplement: s1 [file s1]

**Table S5.** Correlation coefficients between physico-chemical soil characteristics and acetamiprid/thiacloprid desorption parameters obtained by Pseudo First-Order (PFOM), Elowich (EM) and Weber-Morris (WMM) represented by correlation matrix (N = 1200; pooled data; 4 soils x 3 replication x 10 soil characteristics x 10 sorption parameters). Statistically significant correlations ( $p < 0.05$ ) are presented with bold type numbers and with corresponding p values (written in parentheses in italics).

| Variable                                   | pH     | HA <sup>(a)</sup>                   | CEC <sup>(b)</sup>                  | clay                                | TOC <sup>(c)</sup>                  | C <sub>oxHa</sub> <sup>(d)</sup> | C <sub>oxFa</sub> <sup>(e)</sup> | ratio 465/665                       | ratio C/H                           | ratio C/N                           |
|--------------------------------------------|--------|-------------------------------------|-------------------------------------|-------------------------------------|-------------------------------------|----------------------------------|----------------------------------|-------------------------------------|-------------------------------------|-------------------------------------|
| <b>Acetamiprid</b>                         |        |                                     |                                     |                                     |                                     |                                  |                                  |                                     |                                     |                                     |
| <b>q<sub>des</sub></b> <sup>(f)</sup>      | 0.423  | -0.804                              | -0.798                              | 0.481                               | <b>-0.965</b><br>( <i>p=0.035</i> ) | -0.378                           | -0.713                           | <b>-0.997</b><br>( <i>p=0.003</i> ) | -0.887                              | -0.771                              |
| <b>k<sub>1</sub> (PFOM)</b> <sup>(g)</sup> | -0.853 | 0.831                               | 0.848                               | <b>-0.980</b><br>( <i>p=0.020</i> ) | 0.421                               | -0.214                           | 0.693                            | 0.413                               | 0.303                               | 0.868                               |
| <b>(1/Y)Ln(XY) (EM)</b><br><sup>(h)</sup>  | -0.364 | 0.725                               | 0.728                               | -0.388                              | 0.934                               | 0.467                            | 0.624                            | <b>0.980</b><br>( <i>p=0.020</i> )  | 0.855                               | 0.688                               |
| <b>(1/Y) (EM)</b> <sup>(i)</sup>           | 0.497  | -0.842                              | -0.844                              | 0.552                               | <b>-0.959</b><br>( <i>p=0.041</i> ) | -0.376                           | -0.729                           | <b>-0.996</b><br>( <i>p=0.004</i> ) | -0.866                              | -0.815                              |
| <b>C (WMM)</b> <sup>(j)</sup>              | -0.341 | 0.703                               | 0.706                               | -0.3659                             | 0.927                               | 0.481                            | 0.604                            | <b>0.974</b><br>( <i>p=0.026</i> )  | 0.850                               | 0.665                               |
| <b>k (WMM)</b> <sup>(k)</sup>              | 0.698  | <b>-0.977</b><br>( <i>p=0.023</i> ) | <b>-0.977</b><br>( <i>p=0.023</i> ) | 0.804                               | -0.907                              | -0.169                           | -0.850                           | -0.924                              | -0.797                              | <b>-0.968</b><br>( <i>p=0.032</i> ) |
| <b>Thiacloprid</b>                         |        |                                     |                                     |                                     |                                     |                                  |                                  |                                     |                                     |                                     |
| <b>q<sub>des</sub></b> <sup>(f)</sup>      | 0.114  | -0.776                              | -0.656                              | 0.366                               | <b>-0.946</b><br>( <i>p=0.048</i> ) | 0.171                            | -0.908                           | -0.861                              | <b>-0.992</b><br>( <i>p=0.008</i> ) | -0.726                              |
| <b>k<sub>1</sub> (PFOM)</b> <sup>(g)</sup> | -0.711 | <b>0.950</b><br>( <i>p=0.049</i> )  | <b>0.967</b><br>( <i>p=0.033</i> )  | -0.781                              | 0.901                               | 0.271                            | 0.794                            | 0.938                               | 0.776                               | 0.942                               |
| <b>(1/Y)Ln(XY) (EM)</b><br><sup>(h)</sup>  | -0.254 | 0.768                               | 0.718                               | -0.373                              | <b>0.987</b><br>( <i>p=0.013</i> )  | 0.231                            | 0.764                            | <b>0.980</b><br>( <i>p=0.020</i> )  | <b>0.960</b><br>( <i>p=0.040</i> )  | 0.722                               |
| <b>(1/Y) (EM)</b> <sup>(i)</sup>           | 0.159  | -0.792                              | -0.688                              | 0.383                               | <b>-0.972</b><br>( <i>p=0.028</i> ) | 0.075                            | -0.890                           | -0.905                              | <b>-0.999</b><br>( <i>p=0.001</i> ) | -0.743                              |
| <b>C (WMM)</b> <sup>(j)</sup>              | -0.256 | 0.768                               | 0.719                               | -0.374                              | <b>0.987</b><br>( <i>p=0.013</i> )  | 0.234                            | 0.763                            | <b>0.980</b><br>( <i>p=0.020</i> )  | <b>0.959</b><br>( <i>p=0.041</i> )  | 0.722                               |
| <b>k (WMM)</b> <sup>(k)</sup>              | 0.168  | -0.788                              | -0.692                              | 0.375                               | <b>-0.980</b><br>( <i>p=0.020</i> ) | 0.023                            | -0.872                           | -0.922                              | <b>-0.999</b><br>( <i>p=0.001</i> ) | -0.739                              |

---

<sup>(a)</sup> – hydrolitic acidity; <sup>(b)</sup> – cation exchange capacity; <sup>(c)</sup> – total organic carbon; <sup>(d)</sup> – carbon of humic acids; <sup>(e)</sup> – carbon of fulvic acids; <sup>(f)</sup> – desorbed amount in 96. h; <sup>(g)</sup>, <sup>(h)</sup>, <sup>(i)</sup>, <sup>(j)</sup>, <sup>(k)</sup> – parameters obtained by modelling with Pseudo-First Order (PFOM), Elowich (EM) and Weber-Morris (WMM) models.

---
